# Supplementary material for: β2-Integrin Adhesion Regulates Dendritic Cell Epigenetic and Transcriptional Landscapes to Restrict Dendritic Cell Maturation and Tumor Rejection
Source: Oxford University Press journal article supplement (doi:10.1158/2326-6066.cir-21-0094), 2021-09-24
Supplement: 23266066cir210094-sup-260316_3_supp_7397457_qzfzkn.xlsx [file 23266066cir210094-sup-260316_3_supp_7397457_qzfzkn.xlsx]

## Sheet: Ikaros_activated_KI_upregulated
Group	Total	Genes
Ikaros_activated_and_KI_up	132	Hmgn3
		Camp
		Stk40
		Neb
		Apol7c
		Tet2
		Cxcl13
		Sh3bp4
		Il23r
		Adora3
		Fas
		AI504432
		Ccl22
		Sh2d4a
		I830077J02Rik
		Klrk1
		Dusp1
		Pgs1
		Nfkbie
		F2r
		Rab8b
		Stk38l
		Efna2
		Ly6c2
		Mxd1
		Snn
		Adora2a
		AW112010
		Inpp5b
		Klf8
		Grhl1
		Lag3
		Bco2
		Mex3a
		Ppm1k
		Fbrsl1
		Mfsd6l
		Mid1
		Pcgf5
		Socs3
		Carhsp1
		Shf
		Cacng8
		Mllt6
		Zeb1
		Rtn1
		Lysmd2
		Tarm1
		Foxp4
		Tnfrsf11a
		Lipe
		Dbnl
		Itgal
		Zfp36
		Flrt3
		Tpbg
		Fgl2
		H2-M2
		Dgka
		Traf1
		Hs3st3b1
		Sema7a
		Mx1
		Il15
		Car2
		Il15ra
		Pnp2
		Il12b
		Foxp1
		Myo1g
		Apobec3
		Rab11fip1
		Samsn1
		Slc6a4
		Sdc4
		Ccr7
		Mier3
		Plac8
		Rnf145
		Mmp25
		Slco3a1
		Pde1b
		Pfkfb3
		Swap70
		Lad1
		Angpt1
		B3gnt5
		Gca
		Neto2
		Ppp1r15a
		Peli1
		Tspan33
		Spint2
		Slamf7
		Atp2b4
		Slamf6
		Hip1r
		Gnb4
		Tmem131
		Hap1
		Spib
		Osm
		Hdc
		Csrnp1
		Phlpp1
		Myb
		Nudt17
		Fmnl2
		Abtb2
		Cd83
		Il18
		Trib1
		Fscn1
		Cblb
		Dock4
		Marcksl1
		Cd300e
		Gpr171
		Arhgap26
		Dusp5
		Bmp1
		Glipr2
		Pdcd1lg2
		Ncoa7
		Arl5c
		Vrk1
		Spsb1
		Stk39
		Fam89a
		Cd86
		Mefv
		Ogfrl1

## Sheet: PU.1_activated_KI_upregulated
Group	Total	Genes
PU.1_activated_and_KI_up	100	Ehf
		Arhgap28
		Cyp2s1
		Icos
		H2-Eb2
		Stbd1
		Nectin1
		Havcr2
		Cd83
		Htr7
		Sept3
		Adam22
		Celf4
		Ankrd33b
		Adam23
		Dlgap3
		Ccr7
		Ccl5
		Ptger3
		Kit
		Lpar3
		Apol7c
		Adgra2
		Gpr82
		Nr4a3
		Fscn1
		Tcf7l1
		Zfp366
		B630019K06Rik
		Tmod2
		Strip2
		Mical3
		Mmp25
		Arc
		Skint3
		Cacng8
		Adora3
		Gm8221
		Nipal1
		Lad1
		Frmd5
		Ciita
		Slc17a8
		Col27a1
		Tmem150c
		Rtn1
		Pglyrp2
		Slco5a1
		Serpinb9
		Mab21l3
		Fam49a
		Dpp10
		Mtmr4
		Crispld2
		Adcy6
		Tspan9
		Tarm1
		Mreg
		Dusp1
		Dscam
		Cacnb3
		Ffar4
		Dkk2
		Fam149a
		St8sia6
		Ttc39a
		Map3k14
		Jak2
		Hepacam2
		Spsb1
		Arhgef40
		Cadm3
		Hap1
		Cxcl16
		Tlr11
		Klri1
		Grk3
		Fam129a
		Gramd2
		Ppef2
		Fnbp1l
		Adgrg6
		Bcl6
		Dbn1
		Patj
		Ppp1r14a
		Slc46a3
		Oprd1
		Slc16a14
		Fndc7
		P3h2
		Rab30
		Nudt17
		Sspo
		Tmem131l
		Carmil3
		Mefv
		Insm1
		Dscaml1
		Il12b

## Sheet: RelA_bound_KI_upregulated
Group	total	Genes
KI and RelA	1076	Tnfrsf13b
		Cep290
		Polr3c
		Lnx2
		Tlr9
		Rnf115
		Arhgap35
		Inka2
		Mex3b
		Prkag2
		Asap1
		Ptger3
		Kit
		Sult1a1
		Apol7c
		Cxcl13
		Zfp862-ps
		Rasa2
		Zfp362
		Sh3bp4
		Il23r
		Adora3
		Cdkl2
		Fas
		Trim24
		Hr
		Zhx1
		Gm14461
		Mab21l3
		E2f5
		5430427O19Rik
		Crispld2
		Ltf
		Six1
		Ext1
		Sh2d4a
		Noct
		Gpr146
		Zfp760
		Qrsl1
		Dok3
		Kcnk6
		Elmo1
		Yes1
		Plppr4
		Chp2
		Tbc1d14
		Tbc1d4
		Cux1
		Gtpbp1
		Extl1
		Stk38l
		Pde4d
		Hlx
		9130008F23Rik
		Zbtb10
		Rabgap1
		Iffo2
		Rims3
		Ly6c2
		Vgll3
		Cyfip2
		Ifnlr1
		Anks3
		Pla1a
		Tbc1d30
		Dock10
		Gcnt1
		Fyb2
		Nr4a2
		Kbtbd11
		Snd1
		Nacc2
		Ankrd27
		Sbk1
		Exo5
		Rnf144b
		Lag3
		Chst3
		Ppm1k
		Large1
		Pgf
		Lpar3
		Gpr82
		Zfp933
		Tmem123
		Sh3pxd2a
		Ankrd12
		Gpr65
		Mical3
		Plekha5
		Sh2b3
		Shf
		Gpr157
		Ccdc102a
		Lancl1
		Serpinb9
		Prkar2a
		Fam32a
		Fam49a
		Zmynd15
		Tarm1
		Foxp4
		Stxbp3
		Rnf44
		Gemin7
		Prex1
		Lipe
		Dbnl
		Itgal
		Sesn3
		Fam169b
		Spns3
		Stat4
		Ppp1r13b
		Grk3
		S1pr3
		Nlrp1b
		Crtc2
		Nfkb2
		Ptpn9
		Serinc5
		Entpd7
		Pxdc1
		Cdh1
		Gsto1
		Pou4f1
		Ncoa2
		Ier5
		Rftn1
		Traf1
		Eml6
		Arsi
		Dscaml1
		Cyp27a1
		Abcg1
		Cbx7
		Rassf2
		Cyth1
		Rab11fip1
		Lgalsl
		Gadd45b
		Cdc14a
		Ophn1
		Filip1l
		Sdc4
		Etv3
		Carmil1
		Dclk2
		Ocln
		Adgra2
		Psd
		Pdzk1ip1
		Gins3
		Kcna2
		Chka
		Rbbp8
		Pfkfb3
		B3gnt5
		Fgf1
		Neto2
		Timp3
		Foxk1
		Rab3il1
		Peli1
		Traf5
		Icosl
		Bcam
		Ktn1
		Birc2
		Ccr3
		Armc9
		Adam19
		Bahd1
		St8sia6
		Rnf180
		Tmem70
		Ly9
		Mturn
		Zfand6
		Atp2b4
		Ankrd44
		Ppp2r5e
		Zfp62
		Ctnna1
		Endod1
		Ddx20
		Chmp4c
		Pla2g15
		Ankrd13a
		Rcsd1
		Ndp
		Fut8
		Grasp
		Cox17
		Rflnb
		Fmnl2
		Hivep1
		Gltp
		Cnn2
		Map4k4
		Syn3
		Plekhs1
		Nuak2
		H2-K2
		Dclre1c
		Brf1
		Celf4
		Polb
		Siglecg
		Wdfy2
		Lmo1
		Trib1
		Itgb2l
		Tmod2
		Ogdhl
		Prkcq
		Cacnb1
		Uck2
		Gm4956
		Nudt9
		Coro6
		Vopp1
		Ampd2
		Peg13
		Cd40
		Zgpat
		Herpud1
		Naaa
		Icam1
		P2ry10
		Papolg
		Pkdcc
		Huwe1
		Washc1
		Prrg4
		Zc3h12c
		Glipr2
		Gbp8
		Faah
		Rgs10
		Kif5c
		Ncoa7
		Ffar4
		Kif3b
		H13
		Washc2
		Aldh1a2
		Acot2
		Vrk1
		Tprgl
		Aldh9a1
		Zfp568
		Usp35
		6430571L13Rik
		Pyurf
		Limd1
		Ddx17
		Cd86
		Slc5a3
		Slc46a3
		Trim7
		Stat3
		Lrrk1
		Ptpn3
		Nsmaf
		Ahcyl2
		Ap1b1
		Ptchd1
		Cldn1
		Cd8a
		Mycl
		Slc39a8
		Ttc39c
		Cdon
		Cbfa2t3
		Grid1
		Fgd5
		Il1r1
		Chd3
		Rictor
		Ust
		Tet2
		Slc25a29
		Zmiz2
		Fam110b
		Rhobtb2
		Dab2
		Tmtc2
		Ttll4
		Stk4
		Rgs12
		Ciita
		Ehhadh
		Cytip
		Asl
		Ube4a
		Cmc2
		Tmem238
		Ap4s1
		Cd82
		Ccl22
		Klf5
		Lepr
		Arhgap31
		Dpp10
		Afap1l2
		Cacnb3
		Mrps6
		Slc7a5
		Setd2
		Cx3cl1
		Trmt12
		Plbd1
		Tep1
		Fam53b
		Gm266
		Smim5
		Spata31d1b
		Gpr132
		Hcn3
		Map6
		Vac14
		Parva
		Pdlim5
		Tma16
		Nedd4l
		Ppef2
		Pak1
		Tsg101
		Espn
		Fyn
		Inpp5b
		Zfp282
		Aven
		Fat3
		Fbrs
		Sqstm1
		C1qb
		Grhl1
		Havcr2
		Htr7
		Adam22
		Cxcr4
		Grap2
		Akna
		Sac3d1
		Nanos1
		Tmem176b
		Cdc37
		Fbrsl1
		Mfsd6l
		Mob3a
		Mid1
		Gfra2
		Clec2d
		Prdm2
		Zfp217
		Slc22a15
		Ppp1r26
		Sema6d
		Avpi1
		Rbm38
		Mfsd6
		H2-DMa
		C2cd5
		Mvp
		Cyp2ab1
		Slc5a6
		Tnfrsf11a
		Clec10a
		Dennd4a
		Orai2
		Il18r1
		Brd4
		Ctnnd2
		Ear6
		Map6d1
		Nfkbib
		Sec16b
		Ezr
		Socs2
		Tesc
		Bcl9l
		Gdi2
		Gfpt1
		Galnt14
		Epb41
		Rnd3
		Rfx7
		S100a4
		Aff3
		Sema7a
		Casc3
		Tppp3
		Scimp
		Zdhhc3
		H2-Eb2
		Cd24a
		Als2
		Arpin
		Samsn1
		Smarce1
		Slc6a4
		Limd2
		Tmem65
		Plac8
		Rnf145
		Nr4a3
		Klhl8
		Slco3a1
		Pde1b
		Hexim1
		Neurl1a
		Fezf2
		Klri2
		Angpt1
		Plxdc1
		Tjp2
		Chsy3
		Ints3
		Lrp11
		Ccdc71l
		Rasgrp4
		Tox
		Cad
		Mpzl3
		Slc4a8
		Lsp1
		Slc9a9
		Cntrl
		Bdh1
		Ddr1
		Tbc1d15
		Tns1
		Eml5
		Cpox
		Hip1r
		Ap1s3
		Akap13
		Inpp5d
		Tmem131
		Depdc7
		Hhip
		Slc7a7
		Irs2
		Jag2
		Csrnp1
		Psmg4
		H2-Q6
		Susd4
		Phc1
		Pgap1
		Abtb2
		6530402F18Rik
		Arl4c
		Pip4k2a
		Scn3a
		Ankrd33b
		Slc27a3
		Myo5b
		Rassf5
		Nrde2
		Rspry1
		Epcam
		Xrcc5
		Tlk1
		Pld2
		Bcl2l14
		Nfatc1
		Pnpla8
		Dock4
		Fam234b
		Zfp296
		Vcam1
		Zfp945
		Scap
		Gga2
		Faf1
		Dalrd3
		Castor2
		Dusp5
		Tmem37
		Calcb
		Bmp1
		Mtmr4
		Etfb
		Gramd4
		Cited2
		Henmt1
		Itga2b
		Tnni3
		Pdlim7
		Trappc12
		Kcne3
		Ssh1
		Cttnbp2nl
		Tnfrsf18
		Rnf19b
		Msrb3
		Tmem39a
		Fnbp1l
		P2rx5
		Ptms
		Ythdf2
		Tubb2b
		Gbp5
		Psd3
		Tlr12
		Hsd11b2
		Bms1
		Nol6
		Foxo1
		Mefv
		Wnt11
		Sorbs3
		Plekhg2
		Hsd17b4
		Smpd3
		Arl6
		Camp
		Sox4
		Clec4g
		Napsa
		Adam23
		Dock11
		Meis1
		Spag9
		Zbtb16
		Dmrta2
		En2
		Heatr9
		Fndc5
		Pnkd
		Aif1
		Crybg1
		Zfp472
		Fh1
		Thap12
		Tns3
		Nipal1
		Vipr1
		Mboat1
		Ss18
		AI504432
		Sipa1l3
		I830077J02Rik
		Klrk1
		Bpifc
		Sesn2
		Smad4
		F2r
		Trim3
		Jak2
		Bmp2k
		March3
		Asgr2
		Abca6
		Nfatc2
		Cdh2
		Efna2
		Ss18l1
		Mxd1
		Txlnb
		Cdc42ep3
		Dnaaf3
		Dmwd
		Cyp4a12b
		Pik3r1
		Crtc3
		Luzp1
		Jtb
		P3h2
		Casp6
		St3gal1
		Phactr4
		Polr3b
		Scn2b
		P2ry6
		Arhgap28
		Dapp1
		Sall2
		Ly75
		Prpf38b
		Plat
		Vamp5
		Pgm2l1
		Ptger4
		Zbtb7c
		Runx1
		Cyb561
		Kcna3
		Zdhhc1
		Gprc5c
		Bco2
		Mex3a
		Clmn
		Nfkb1
		Slc26a2
		Jaml
		Ptpn4
		Git2
		Arl2bp
		Trim36
		Tgfb2
		Pcgf5
		Carhsp1
		Id1
		Mllt6
		Pkib
		Rap2b
		Kctd14
		Rufy4
		Afap1
		Spr
		Rtn1
		Cdhr1
		Ift140
		Pim2
		Cpeb1
		Cyp11a1
		Serpinf1
		Dscam
		Apof
		Pias3
		Slc25a35
		Arntl
		Slc44a1
		Zfp36
		Pik3cg
		Arhgef40
		Sinhcaf
		Tpbg
		Trit1
		Setd7
		Mcrip1
		Pard6g
		Snx3
		Fgl2
		Gpcpd1
		Adra2a
		Clec2l
		Stard10
		H2-M2
		Nr4a1
		Net1
		Il12rb2
		Hs3st3b1
		Slc16a14
		Mx1
		Spic
		St6gal1
		Car2
		Il15ra
		Dpf3
		Madd
		Cacna2d2
		Vasp
		Il12b
		Mgl2
		Icos
		Foxp1
		Bcas3
		Scin
		Myo1g
		Apobec3
		H2-Ab1
		Rnf152
		Prkar2b
		Sdad1
		Ssbp3
		Cd48
		Ccl5
		Hspg2
		Senp6
		Mmp25
		Zfp622
		Kcnc3
		Ky
		Reps1
		Swap70
		Otulinl
		Synj1
		Slc22a23
		Ppp1r15a
		Snupn
		Vat1l
		Arhgef6
		Samd5
		Spint2
		Rnf125
		Prkaa2
		Slain1
		Slamf6
		Rgs18
		Fam71e1
		Osm
		Epop
		2410002F23Rik
		Akr7a5
		D630039A03Rik
		Saa3
		Map3k6
		Bcl6
		Morn3
		Zbtb1
		Cd163
		Cd244a
		Arhgef10l
		Lpcat1
		Fndc7
		Btc
		Hsf2
		Myb
		Insm1
		Slc17a5
		Zc3h7b
		Ehf
		Zdhhc15
		Sema4a
		Fosb
		Pald1
		Uvrag
		Fchsd2
		Btaf1
		Prr7
		Cd83
		Rasal2
		Tcp11l1
		Izumo4
		Gyg
		Ppfibp2
		Sepsecs
		Rasgrp1
		Zfp366
		Cblb
		Nub1
		Ppp1r12a
		Necap2
		Vav3
		Timp2
		Sft2d2
		Marcksl1
		Ldhc
		S100a8
		Pdzd4
		Gpr171
		Clasp2
		Secisbp2l
		Bicral
		Arhgap26
		Slc33a1
		Fam131a
		Ikbkb
		Slco5a1
		Rnf219
		Fam13b
		Fam120c
		Nabp1
		B4galt4
		Lrrc1
		Dkk2
		Celsr1
		Arl5c
		Kynu
		Map3k14
		Pnrc1
		Slc1a4
		Traf4
		Dyrk1a
		Apip
		Kmo
		Syne2
		Prg2
		Inpp4b
		Bcl2l11
		Tbc1d9
		Il18rap
		Adgrg6
		Cd1d1
		Dock9
		Paqr8
		Ipcef1
		Tes
		Rmnd5b
		Lrch4
		Slc35g1
		Tmem8
		Mbnl1
		Tspoap1
		Rnf187
		Nfe2l3
		Egfr
		Mtmr12
		Stk40
		C1qa
		Zfp942
		Klhl21
		Rab37
		Neb
		Qser1
		Pacsin2
		Scn4b
		Dpp6
		Ppp1r9a
		Atmin
		Adamts7
		N4bp2l1
		Gpbp1
		Nrg1
		Tal1
		Plcl1
		Gcat
		Pdlim2
		Pik3r5
		Cables1
		Parp8
		Cdh6
		Ms4a7
		Prdm1
		Mob3b
		Dusp1
		Bloc1s2
		Pgs1
		Mylip
		Ccser2
		Nfkbie
		Crem
		Acvr2a
		Nap1l2
		Foxq1
		Rab8b
		Ppp3ca
		Cldnd2
		Dpysl5
		Atrx
		Ccdc88a
		Nectin2
		Ssh2
		Rcn3
		Snn
		Rnase12
		Ccdc85a
		Fgd2
		Creb5
		Adora2a
		Lrrc42
		Tent5c
		Rmnd5a
		AW112010
		Oprd1
		Rab30
		Tmem131l
		Sdhaf2
		Tspan2
		Dna2
		Tmem173
		Tet3
		Ddx6
		Abcc4
		Sv2b
		Zfp36l1
		Cnksr3
		Fmnl1
		Tmcc2
		Rab6b
		Nedd4
		Zbtb46
		Kdm1b
		Efnb2
		Socs3
		Aebp2
		Mgam
		Rogdi
		Cacng8
		Ccnk
		Zeb1
		Cst3
		Lfng
		Frmd4b
		Stk17b
		Btbd17
		Exoc3l4
		Usp22
		Nck2
		Asb16
		Bid
		Tgs1
		Pura
		Rel
		Arhgap30
		Furin
		Plxnc1
		Flrt3
		Slc40a1
		Crebbp
		Mapk13
		Fbl
		Slc7a6
		Spata5
		Ikzf4
		Relb
		Ace
		Mtss1
		Kdm4a
		Eef2k
		Zscan26
		Pdgfc
		Nup88
		Pax6
		Dgka
		Maco1
		Alox15
		Asap2
		Skil
		Rala
		Gucd1
		Stx11
		Il15
		Flt3
		Kif9
		Cstf3
		Spn
		Pnp2
		Tmem120b
		Cyp2s1
		Tyk2
		Pkp2
		Supt4a
		Lancl2
		Trappc5
		Eipr1
		Pepd
		Pdcd1
		Ccr7
		Mier3
		Itgae
		Smurf1
		Cirbp
		Rcl1
		Tiam1
		Rps6kc1
		Marcks
		Strip2
		Tmem176a
		Snapc5
		Lad1
		Prodh
		Zfp687
		Zfp101
		Tuba4a
		Ffar2
		Gca
		Fbxo11
		Rgs3
		Laptm4b
		Sh3d21
		Pikfyve
		Atxn7l3b
		Trpv4
		Orai1
		Itga4
		C1qc
		Adcy6
		Fam217b
		Tspan9
		Grap
		Tspan33
		Osbpl10
		Gli3
		Erlin1
		Plek2
		Tfrc
		Mical2
		Capn13
		Aff1
		Hepacam2
		Slamf7
		Pde4b
		Lpar5
		Mylk
		Tgfbr1
		Crebl2
		4921531C22Rik
		Syde2
		Hap1
		Tlr11
		Dexi
		Klri1
		Fam129a
		Arhgap22
		Etl4
		Nol7
		Olfm1
		St8sia1
		Ctdp1
		Klrg2
		Dennd5a
		Krba1
		Hdc
		Gpr85
		Ppp1r14a
		Phlpp1
		Nudt17
		Gdpd5
		4930523C07Rik
		Mapkap1
		Prkce
		Cd74
		Lta
		Stxbp6
		1700025G04Rik
		Snx8
		Abcg3
		March8
		Cldnd1
		Socs1
		Cxxc5
		Cmtm6
		Tnfrsf25
		Il18
		Fscn1
		Pbx3
		Tmem243
		Myh7
		Cd70
		Lrp3
		Skint3
		Sik1
		Zfp263
		Bcl11a
		Frmd5
		Cd300e
		Slc17a8
		Eno2
		Col27a1
		Adi1
		Phf24
		Eps8l2
		Elmsan1
		Kcnh3
		Rara
		Trip12
		Ttc7
		Soga1
		Mreg
		Hemk1
		Rtn4r
		Rabgap1l
		Pdcd1lg2
		Lipn
		Rtl9
		Csgalnact1
		Poglut1
		Spsb1
		Ptprf
		Stk39
		Tspan13
		Adm
		Rcbtb1
		Itga2
		Rassf4
		Vhl
		Cyth3
		Lama2
		Radil
		Snx11
		Klrb1f
		Arpp19
		Ahnak
		Enah
		Spire1
		Stat5a
		H2-Q7
		Bmf
		Ogfrl1
